the meantime the comet's perihelion passage was computed to occur on November 23, but the comet was moving farther away from the Earth. On the evening of November 2, at 6<sup>h</sup> 40<sup>m</sup>, the comet was observed in R.A. 17<sup>h</sup> 20<sup>m</sup> 40<sup>s</sup>, decl. north 25° 11', when it appeared brighter than at the last observation, and the first glimpse of a broad short tail was noted.

On November 11, when the comet was in R.A. 17<sup>h</sup> 52<sup>m</sup> 40<sup>s</sup>, decl. north 7° 54', two tails were plainly seen nearly at right angles to each other. The more prominent one was pointed away from the Sun, the second tail to the northward. A drawing of the comet is herewith given as it appeared on this occasion, and another drawing showing its appearance on the evening of November 15, when only one tail was visible with the optical power at my command, and that pointing away from the Sun. The comet's position on this date, November 15, at 7<sup>h</sup> 14<sup>m</sup>, was R.A. 18<sup>h</sup> 0<sup>m</sup> 40<sup>s</sup>, decl. north 2° 33'. The comet at its brightest was just visible to the naked eye, and readily picked up with a good opera or field glass.

As a matter of record in the enduring archives of the Royal Astronomical Society, may I be allowed to say that I have now been permitted to reach "my majority" in cometary discovery, this latest comet being my twenty-first? Thirteen of these were made with reflecting telescopes, of my own construction, of 5 and 9 inches aperture respectively. The remaining eight comets were discovered with the 10-inch equatorial refractor of this observatory.

*Smith Observatory, Geneva, New York, U.S.A.:*  
1898 November 26.

---

*Observations of Comet Coddington (c 1898). By John Tebbutt.*

I have much pleasure in transmitting observations of comet *Coddington* (c 1898), comprising 67 nights' work, from 1898 June 15 to October 18. They were made with a square bar-micrometer on the 8-inch equatorial. The differential coordinates are corrected for errors in the orientation and form of the micrometer, and for the comet's proper motion, but not for refraction, which was hardly sensible. The comet was small throughout, with a condensation in its centre, and admitted of pretty accurate observations. The concluded values of R.A. and N.P.D. are uncorrected for parallax. I fear the comet will be too faint for re-observation after the full Moon; but should I succeed in picking it up again I will forward the observations in due time.

| 1898.   | Wisor<br>Mean<br>Time. |    |    | Comet—Star. |             | No. of<br>Comps. | Comet's Apparent |             |            | Comp.<br>Star. |       |     |     |      |    |
|---------|------------------------|----|----|-------------|-------------|------------------|------------------|-------------|------------|----------------|-------|-----|-----|------|----|
|         | h                      | m  | s  | R.A.<br>m   | N.P.D.<br>s |                  | R.A.<br>h        | N.P.D.<br>m | Star.<br>s |                |       |     |     |      |    |
| June 15 | 8                      | 26 | 27 | - 4         | 54'64       | - 9              | 56''0            | 2           | 16         | 14             | 3'18  | 117 | 16  | 5''3 | 1  |
| 16      | 7                      | 39 | 35 | - 1         | 19'81       | + 4              | 50'8             | 12          | 16         | 10             | 42'42 | 117 | 52  | 26'1 | 2  |
| 17      | 8                      | 48 | 9  | - 5         | 0'14        | + 9              | 45'0             | 8           | 16         | 7              | 2'51  | 118 | 31  | 32'1 | 3  |
| 22      | 8                      | 27 | 41 | - 0         | 33'11       | + 2              | 46'6             | 8           | 15         | 49             | 19'75 | 121 | 32  | 16'3 | 4  |
| 24      | 6                      | 35 | 26 | - 0         | 53'56       | + 8              | 49'4             | 15          | 15         | 42             | 27'55 | 122 | 38  | 48'9 | 5  |
| 25      | 7                      | 2  | 43 | - 2         | 51'60       | + 2              | 6'9              | 10          | 15         | 38             | 48'81 | 123 | 13  | 10'8 | 6  |
| 25      | 7                      | 2  | 43 | - 5         | 43'74       | - 6              | 6'0              | 10          | 15         | 38             | 49'02 | 123 | 13  | 9'3  | 7  |
| 26      | 6                      | 38 | 47 | + 1         | 31'19       | + 2              | 8'1              | 5           | ...        | ...            | ...   | ... | ... | ...  | 8  |
| 26      | 6                      | 38 | 47 | + 0         | 45'07       | + 2              | 7'4              | 5           | ...        | ...            | ...   | ... | ... | ...  | 9  |
| 27      | 6                      | 55 | 21 | - 1         | 18'97       | + 0              | 26'7             | 8           | 15         | 31             | 43'50 | 124 | 18  | 41'2 | 10 |
| 27      | 6                      | 55 | 21 | - 1         | 44'65       | - 1              | 0'9              | 8           | ...        | ...            | ...   | ... | ... | ...  | 11 |
| 27      | 6                      | 55 | 21 | - 4         | 31'69       | - 4              | 34'7             | 8           | 15         | 31             | 43'64 | 124 | 18  | 41'2 | 12 |
| 28      | 6                      | 44 | 6  | + 0         | 55'40       | - 11             | 12'1             | 10          | ...        | ...            | ...   | ... | ... | ...  | 13 |
| 29      | 6                      | 29 | 52 | + 4         | 23'62       | - 4              | 21'3             | 2           | 15         | 24             | 45'66 | 125 | 21  | 15'5 | 14 |
| 29      | 6                      | 29 | 52 | + 0         | 7'32        | + 3              | 37'6             | 2           | 15         | 24             | 45'46 | 125 | 21  | 15'9 | 15 |
| July 3  | 6                      | 33 | 1  | - 1         | 56'00       | + 7              | 13'8             | 8           | ...        | ...            | ...   | ... | ... | ...  | 16 |
| 3       | 6                      | 33 | 1  | - 4         | 21'39       | + 8              | 32'5             | 8           | ...        | ...            | ...   | ... | ... | ...  | 17 |
| 3       | 6                      | 33 | 1  | - 4         | 40'17       | + 3              | 17'4             | 8           | 15         | 11             | 2'37  | 127 | 19  | 42'1 | 18 |
| 5       | 7                      | 7  | 29 | + 0         | 41'03       | - 9              | 1'2              | 10          | 15         | 4              | 19'91 | 128 | 15  | 29'3 | 19 |
| 6       | 6                      | 43 | 49 | - 0         | 50'67       | - 1              | 49'1             | 10          | ...        | ...            | ...   | ... | ... | ...  | 20 |
| 7       | 6                      | 57 | 55 | + 7         | 44'47       | + 7              | 17'7             | 7           | 14         | 57             | 54'79 | 129 | 7   | 50'0 | 21 |
| 8       | 6                      | 40 | 56 | + 2         | 39'51       | + 2              | 40'5             | 10          | 14         | 54             | 48'90 | 129 | 32  | 45'5 | 22 |
| 8       | 6                      | 40 | 56 | - 0         | 57'49       | + 1              | 39'5             | 10          | ...        | ...            | ...   | ... | ... | ...  | 23 |
| 10      | 6                      | 36 | 51 | + 4         | 0'12        | - 1              | 56'1             | 8           | ...        | ...            | ...   | ... | ... | ...  | 24 |
| 10      | 6                      | 36 | 51 | + 3         | 12'89       | - 1              | 58'5             | 8           | 14         | 48             | 42'64 | 130 | 21  | 30'5 | 25 |
| 11      | 6                      | 45 | 37 | - 2         | 54'45       | + 2              | 23'0             | 4           | 14         | 45             | 43'84 | 130 | 45  | 1'2  | 26 |
| 12      | 9                      | 19 | 58 | + 1         | 0'95        | - 2              | 0'1              | 12          | 14         | 42             | 29'77 | 131 | 10  | 35'9 | 27 |
| 13      | 9                      | 9  | 32 | - 1         | 55'60       | + 6              | 20'1             | 10          | ...        | ...            | ...   | ... | ... | ...  | 28 |
| 13      | 9                      | 9  | 32 | - 3         | 57'78       | + 7              | 2'9              | 10          | 14         | 39             | 40'78 | 131 | 32  | 48'5 | 29 |
| 14      | 9                      | 31 | 38 | + 2         | 37'13       | + 8              | 10'5             | 10          | 14         | 36             | 51'87 | 131 | 54  | 58'7 | 30 |
| 15      | 9                      | 16 | 19 | - 1         | 28'59       | - 5              | 30'9             | 10          | 14         | 34             | 11'01 | 132 | 15  | 59'1 | 31 |
| 18      | 9                      | 36 | 26 | + 2         | 42'52       | - 7              | 19'0             | 10          | 14         | 26             | 25'22 | 133 | 17  | 35'6 | 32 |
| 19      | 9                      | 18 | 31 | - 4         | 10'59       | + 1              | 40'0             | 10          | ...        | ...            | ...   | ... | ... | ...  | 33 |
| 20      | 8                      | 46 | 7  | + 3         | 26'87       | + 4              | 34'3             | 8           | 14         | 21             | 41'91 | 133 | 55  | 48'5 | 34 |
| 21      | 8                      | 46 | 16 | + 3         | 45'89       | + 2              | 45'4             | 6           | 14         | 19             | 23'50 | 134 | 14  | 39'2 | 35 |
| 21      | 8                      | 46 | 16 | - 5         | 52'98       | - 7              | 0'2              | 6           | 14         | 19             | 23'30 | 134 | 14  | 39'9 | 36 |
| 22      | 9                      | 0  | 35 | + 2         | 51'97       | - 10             | 0'9              | 9           | 14         | 17             | 7'35  | 134 | 33  | 22'3 | 37 |
| 24      | 7                      | 40 | 52 | - 4         | 21'08       | - 3              | 47'0             | 10          | 14         | 12             | 58'39 | 135 | 8   | 34'6 | 38 |

Dec. 1898.

Comet Coddington (c 1898).

95.

| 1898. | Windsor<br>Mean<br>Time. |   |    | Comet—Star.<br>R.A. N.P.D. |   |    | No. of<br>Comps. | Comet's Apparent<br>R.A. N.P.D. |     |    | Comp.<br>star. |   |    |     |     |     |     |     |     |     |     |    |
|-------|--------------------------|---|----|----------------------------|---|----|------------------|---------------------------------|-----|----|----------------|---|----|-----|-----|-----|-----|-----|-----|-----|-----|----|
|       | h                        | m | s  | m                          | s | '  |                  | ''                              | ''' | h  |                | m | s  | '   | ''  | ''' |     |     |     |     |     |    |
| July  | 26                       | 9 | 5  | 36                         | - | 4  | 4                | 53                              | +   | 9  | 0              | 1 | 10 | 14  | 8   | 51  | 30  | 135 | 44  | 41  | 7   | 39 |
|       | 27                       | 8 | 31 | 23                         | - | 7  | 59               | 06                              | -   | 10 | 37             | 5 | 4  | ... | ... | ... | ... | ... | ... | ... | ... | 40 |
|       | 27                       | 8 | 31 | 23                         | - | 9  | 31               | 49                              | -   | 10 | 56             | 1 | 4  | ... | ... | ... | ... | ... | ... | ... | ... | 41 |
|       | 27                       | 8 | 31 | 23                         | - | 11 | 21               | 94                              | -   | 2  | 54             | 3 | 4  | 14  | 7   | 0   | 36  | 136 | 1   | 31  | 2   | 42 |
|       | 28                       | 9 | 1  | 9                          | + | 0  | 35               | 79                              | -   | 7  | 17             | 3 | 10 | ... | ... | ... | ... | ... | ... | ... | ... | 43 |
|       | 28                       | 9 | 1  | 9                          | - | 5  | 32               | 08                              | -   | 7  | 47             | 4 | 10 | 14  | 5   | 7   | 67  | 136 | 18  | 55  | 3   | 44 |
|       | 29                       | 8 | 42 | 7                          | - | 1  | 9                | 05                              | +   | 9  | 21             | 7 | 10 | ... | ... | ... | ... | ... | ... | ... | ... | 45 |
|       | 31                       | 8 | 38 | 27                         | - | 0  | 30               | 11                              | +   | 1  | 58             | 4 | 10 | 14  | 0   | 2   | 03  | 137 | 8   | 31  | 9   | 46 |
|       | 31                       | 8 | 38 | 27                         | - | 4  | 11               | 47                              | -   | 9  | 8              | 6 | 10 | 14  | 0   | 2   | 06  | 137 | 8   | 29  | 2   | 47 |
| Aug.  | 1                        | 9 | 10 | 59                         | - | 5  | 48               | 71                              | +   | 7  | 37             | 0 | 8  | 13  | 58  | 24  | 80  | 137 | 25  | 14  | 7   | 47 |
|       | 5                        | 8 | 23 | 41                         | + | 3  | 0                | 04                              | +   | 5  | 7              | 5 | 10 | 13  | 52  | 42  | 46  | 138 | 29  | 0   | 4   | 48 |
|       | 5                        | 8 | 23 | 41                         | + | 1  | 19               | 63                              | -   | 2  | 40             | 5 | 10 | 13  | 52  | 42  | 43  | 138 | 29  | 0   | 6   | 49 |
|       | 6                        | 8 | 16 | 38                         | + | 0  | 59               | 66                              | +   | 7  | 33             | 7 | 1  | ... | ... | ... | ... | ... | ... | ... | ... | 50 |
|       | 8                        | 7 | 34 | 41                         | + | 0  | 4                | 47                              | +   | 4  | 41             | 3 | 10 | ... | ... | ... | ... | ... | ... | ... | ... | 51 |
|       | 9                        | 8 | 31 | 39                         | + | 6  | 34               | 72                              | -   | 5  | 8              | 0 | 6  | 13  | 47  | 53  | 60  | 139 | 32  | 13  | 7   | 52 |
|       | 9                        | 8 | 31 | 39                         | + | 4  | 12               | 27                              | -   | 6  | 36             | 7 | 6  | ... | ... | ... | ... | ... | ... | ... | ... | 53 |
|       | 11                       | 7 | 44 | 58                         | - | 6  | 57               | 67                              | +   | 10 | 21             | 9 | 4  | 13  | 45  | 49  | 75  | 140 | 3   | 9   | 8   | 54 |
|       | 12                       | 7 | 34 | 1                          | - | 1  | 22               | 28                              | -   | 6  | 39             | 9 | 7  | 13  | 44  | 54  | 13  | 140 | 18  | 45  | 2   | 55 |
|       | 14                       | 7 | 53 | 24                         | + | 2  | 51               | 47                              | -   | 5  | 18             | 0 | 10 | 13  | 43  | 6   | 05  | 140 | 50  | 24  | 4   | 56 |
|       | 17                       | 7 | 52 | 59                         | + | 1  | 9                | 32                              | -   | 10 | 15             | 6 | 10 | 13  | 40  | 47  | 95  | 141 | 37  | 51  | 4   | 57 |
|       | 19                       | 7 | 37 | 24                         | - | 0  | 10               | 21                              | +   | 8  | 59             | 3 | 10 | 13  | 39  | 30  | 58  | 142 | 9   | 35  | 3   | 58 |
|       | 20                       | 7 | 29 | 47                         | - | 6  | 35               | 62                              | +   | 6  | 52             | 5 | 10 | 13  | 38  | 55  | 68  | 142 | 25  | 34  | 1   | 59 |
|       | 20                       | 7 | 29 | 47                         | - | 6  | 37               | 63                              | +   | 6  | 46             | 5 | 10 | 13  | 38  | 55  | 54  | 142 | 25  | 34  | 1   | 60 |
|       | 21                       | 7 | 50 | 45                         | - | 2  | 10               | 09                              | -   | 4  | 48             | 4 | 10 | 13  | 38  | 23  | 43  | 142 | 41  | 59  | 4   | 61 |
|       | 22                       | 7 | 56 | 19                         | + | 4  | 26               | 29                              | +   | 0  | 56             | 1 | 10 | 13  | 37  | 54  | 08  | 142 | 58  | 15  | 1   | 62 |
|       | 23                       | 7 | 34 | 4                          | - | 0  | 30               | 87                              | +   | 0  | 54             | 4 | 10 | ... | ... | ... | ... | ... | ... | ... | ... | 63 |
|       | 26                       | 7 | 47 | 26                         | + | 1  | 6                | 40                              | +   | 1  | 2              | 2 | 10 | 13  | 36  | 21  | 48  | 144 | 4   | 0   | 5   | 64 |
| Sept. | 6                        | 7 | 33 | 32                         | + | 3  | 5                | 40                              | +   | 8  | 28             | 3 | 10 | 13  | 35  | 16  | 92  | 147 | 15  | 5   | 5   | 65 |
|       | 6                        | 7 | 33 | 32                         | - | 1  | 38               | 19                              | +   | 10 | 10             | 5 | 10 | 13  | 35  | 16  | 62  | 147 | 15  | 6   | 8   | 66 |
|       | 7                        | 7 | 59 | 8                          | + | 1  | 40               | 46                              | +   | 8  | 50             | 1 | 4  | 13  | 35  | 24  | 38  | 147 | 33  | 44  | 2   | 67 |
|       | 8                        | 7 | 35 | 39                         | + | 4  | 5                | 39                              | -   | 2  | 12             | 5 | 8  | 13  | 35  | 33  | 39  | 147 | 51  | 50  | 0   | 68 |
|       | 8                        | 7 | 35 | 39                         | - | 3  | 21               | 06                              | +   | 7  | 37             | 8 | 8  | 13  | 35  | 33  | 31  | 147 | 51  | 50  | 9   | 69 |
|       | 10                       | 7 | 21 | 5                          | + | 0  | 43               | 28                              | +   | 12 | 14             | 4 | 8  | 13  | 36  | 0   | 32  | 148 | 28  | 53  | 9   | 70 |
|       | 11                       | 7 | 30 | 44                         | + | 1  | 50               | 19                              | +   | 5  | 4              | 3 | 10 | 13  | 36  | 14  | 98  | 148 | 48  | 6   | 3   | 71 |
|       | 11                       | 7 | 30 | 44                         | - | 0  | 55               | 18                              | +   | 4  | 22             | 0 | 10 | 13  | 36  | 14  | 91  | 148 | 48  | 3   | 9   | 72 |
|       | 12                       | 7 | 25 | 57                         | - | 5  | 14               | 34                              | +   | 7  | 32             | 0 | 7  | 13  | 36  | 32  | 61  | 149 | 7   | 5   | 2   | 73 |
|       | 13                       | 7 | 27 | 25                         | - | 5  | 37               | 35                              | +   | 1  | 10             | 3 | 7  | ... | ... | ... | ... | ... | ... | ... | ... | 74 |
|       | 15                       | 7 | 32 | 30                         | - | 4  | 37               | 16                              | -   | 9  | 33             | 1 | 8  | 13  | 37  | 39  | 23  | 150 | 5   | 28  | 6   | 75 |

| 1898.    | Windsor<br>Mean<br>Time. |    |    | Comet—Star. |        |      | No. of<br>Comps. | Comet's Apparent |     |     | Comp.<br>Star. |               |    |
|----------|--------------------------|----|----|-------------|--------|------|------------------|------------------|-----|-----|----------------|---------------|----|
|          | h                        | m  | s  | R.A.        | N.P.D. | R.A. |                  | N.P.D.           |     |     |                |               |    |
| Sept. 16 | 7                        | 27 | 1  | - 3         | 3'70   | + 7  | 0"8              | 10               | 13  | 38  | 6'71           | 150° 25' 20"3 | 76 |
| 16       | 7                        | 27 | 1  | - 4         | 9'47   | + 10 | 20"1             | 10               | 13  | 38  | 6'91           | 150 25 21'5   | 75 |
| 18       | 7                        | 11 | 27 | + 3         | 22'15  | - 8  | 21'5             | 6                | 13  | 39  | 5'86           | 151 5 21'8    | 77 |
| 18       | 7                        | 11 | 27 | + 2         | 48'82  | - 6  | 39'4             | 6                | 13  | 39  | 6'02           | 151 5 23'1    | 78 |
| 20       | 7                        | 24 | 39 | + 1         | 0'83   | - 10 | 13'6             | 7                | 13  | 40  | 15'15          | 151 46 33'5   | 79 |
| 20       | 7                        | 24 | 39 | - 2         | 36'26  | + 0  | 8'7              | 7                | 13  | 40  | 14'86          | 151 46 33'4   | 80 |
| 23       | 7                        | 26 | 24 | - 3         | 1'86   | - 1  | 45'7             | 10               | 13  | 42  | 16'51          | 152 49 40'7   | 81 |
| 30       | 7                        | 25 | 41 | - 2         | 31'28  | + 5  | 36'0             | 4                | 13  | 48  | 24'89          | 155 24 1'6    | 82 |
| Oct. 3   | 7                        | 26 | 46 | + 4         | 43'94  | + 9  | 7'0              | 3                | 13  | 51  | 42'93          | 156 33 19'9   | 83 |
| 3        | 7                        | 26 | 46 | + 4         | 40'97  | + 9  | 25'0             | 3                | 13  | 51  | 43'11          | 156 33 21'6   | 84 |
| 5        | 7                        | 32 | 51 | + 2         | 43'04  | - 0  | 6'5              | 8                | 13  | 54  | 12'89          | 157 20 49'5   | 85 |
| 5        | 7                        | 32 | 51 | + 2         | 23'98  | - 0  | 32'3             | 8                | 13  | 54  | 12'77          | 157 20 49'8   | 86 |
| 6        | 7                        | 47 | 32 | - 4         | 6'96   | + 5  | 10'9             | 5                | 13  | 55  | 33'49          | 157 45 0'8    | 87 |
| 6        | 7                        | 47 | 32 | - 5         | 17'77  | + 5  | 26'0             | 5                | 13  | 55  | 33'74          | 157 45 1'9    | 88 |
| 9        | 7                        | 32 | 36 | + 5         | 35'99  | - 8  | 2'5              | 4                | ... | ... | ...            | ...           | 89 |
| 10       | 7                        | 41 | 45 | - 1         | 4'44   | + 8  | 32'5             | 10               | 14  | 1   | 34'77          | 159 23 0'7    | 90 |
| 15       | 7                        | 45 | 20 | + 6         | 19'08  | - 8  | 17'9             | 4                | 14  | 10  | 51'47          | 161 30 37'0   | 91 |
| 18       | 7                        | 41 | 31 | - 0         | 53'89  | + 5  | 43'7             | 10               | 14  | 17  | 42'63          | 162 49 32'3   | 92 |

*Adopted Mean Places of the Comparison Stars for 1898.0.*

| Star. | Mean R.A. |    |       | Red. to<br>App.<br>R.A. | Mean N.P.D. | Red. to<br>App.<br>N.P.D. | Authorities. |        |                                                                                  |
|-------|-----------|----|-------|-------------------------|-------------|---------------------------|--------------|--------|----------------------------------------------------------------------------------|
|       | h         | m  | s     | s                       | °           | '                         | "            |        |                                                                                  |
| 1     | 16        | 18 | 53'56 | + 4'26                  | 117         | 25                        | 48'4         | + 12'9 | Arg.-Oeltzen 15599-600; Argent. Gen. Cat. 22232.                                 |
| 2     | 16        | 11 | 57'98 | + 4'25                  | 117         | 47                        | 21'7         | + 13'6 | Arg.-Oeltzen 15482; Argent. Gen. Cat. 22077; Stone, 8858.                        |
| 3     | 16        | 11 | 58'38 | + 4'27                  | 118         | 21                        | 33'4         | + 13'7 | Arg.-Oeltzen 15481; Argent. Gen. Cat. 22078; Stone, 8857; Radcliffe, 1890, 4222. |
| 4     | 15        | 49 | 48'58 | + 4'28                  | 121         | 29                        | 13'2         | + 16'5 | Argent. Gen. Cat. 21576; Stone, 8653; Radcliffe, 1890, 4110.                     |
| 5     | 15        | 43 | 16'84 | + 4'27                  | 122         | 29                        | 42'1         | + 17'4 | Argent. Gen. Cat. 21432; Stone, 8594.                                            |
| 6     | 15        | 41 | 36'13 | + 4'28                  | 123         | 10                        | 46'2         | + 17'7 | Argent. Gen. Cat. 21390.                                                         |
| 7     | 15        | 44 | 28'45 | + 4'31                  | 123         | 18                        | 57'8         | + 17'5 | Argent. Gen. Cat. 21454; Stone, 8602; Radcliffe, 1890, 4083.                     |
| 8     | 15        | 33 | 42    | + 4'25                  | 123         | 49                        |              | + 18'6 | Equatorial. Star = 10 mag.                                                       |
| 9     | 15        | 34 | 28    | + 4'25                  | 123         | 49                        |              | + 18'5 | Equatorial. Star = 10 mag.                                                       |
| 10    | 15        | 32 | 58'21 | + 4'26                  | 124         | 17                        | 55'7         | + 18'8 | Argent. Gen. Cat. 21198.                                                         |

Dec. 1898.

*Comet Coddington (c 1898).*

97

| Star. | Mean R.A.   | Red. to<br>App.<br>R.A. | Mean N.P.D. | Red. to<br>App.<br>N.P.D. | Authorities.                                                                      |
|-------|-------------|-------------------------|-------------|---------------------------|-----------------------------------------------------------------------------------|
|       | h m s       | s                       | ° ' "       | "                         |                                                                                   |
| 11    | 15 33 24    | +4'26                   | 124 19 "    | +18'8                     | Equatorial. Star=9 mag.                                                           |
| 12    | 15 36 11'05 | +4'28                   | 124 22 57'4 | +18'5                     | Argent. Gen. Cat. 21274; Stone,<br>8533.                                          |
| 13    | 15 27 17    | +4'24                   | 125 1       | +19'5                     | Equatorial. Star=9 mag.                                                           |
| 14    | 15 20 17'85 | +4'19                   | 125 25 16'6 | +20'2                     | Argent. Gen. Cat. 20903; Stone,<br>8395.                                          |
| 15    | 15 24 33'92 | +4'22                   | 125 17 18'5 | +19'8                     | Argent. Gen. Cat. 21003.                                                          |
| 16    | 15 12 54    | +4'16                   | 127 12      | +21'5                     | Equatorial. Star=9 mag.                                                           |
| 17    | 15 15 20    | +4'18                   | 127 11      | +21'3                     | Equatorial. Star=8½ mag.                                                          |
| 18    | 15 15 38'35 | +4'19                   | 127 16 3'4  | +21'3                     | Argent. Gen. Cat. 20803; Stone,<br>8351.                                          |
| 19    | 15 3 34'78  | +4'10                   | 128 24 7'9  | +22'6                     | Argent. Gen. Cat. 20546; Stone,<br>8237.                                          |
| 20    | 15 1 55     | +4'09                   | 128 43      | +22'9                     | Equatorial. Star=8½ mag.                                                          |
| 21    | 14 50 6'35  | +3'97                   | 129 0 8'5   | +23'8                     | Argent. Gen. Cat. 20221; Stone,<br>8128.                                          |
| 22    | 14 52 5'40  | +3'99                   | 129 29 41'1 | +23'9                     | Argent. Gen. Cat. 20274; Stone,<br>8150.                                          |
| 23    | 14 55 42    | +4'03                   | 129 31      | +23'6                     | Equatorial. Star=9 mag.                                                           |
| 24    | 14 44 39    | +3'92                   | 130 23      | +24'7                     | Equatorial. Star=9 mag.                                                           |
| 25    | 14 45 25'82 | +3'93                   | 130 23 4'4  | +24'6                     | Argent. Gen. Cat. 20120.                                                          |
| 26    | 14 48 34'33 | +3'96                   | 130 42 13'7 | +24'5                     | " " 20185.                                                                        |
| 27    | 14 41 24'94 | +3'88                   | 131 12 10'8 | +25'2                     | " " 20026.                                                                        |
| 28    | 14 41 32    | +3'88                   | 131 26      | +25'2                     | Equatorial. Star=9 mag.                                                           |
| 29    | 14 43 34'66 | +3'90                   | 131 25 20'5 | +25'1                     | Argent. Gen. Cat. 20081; Stone,<br>8067.                                          |
| 30    | 14 34 10'95 | +3'79                   | 131 46 22'4 | +25'8                     | Argent. Gen. Cat. 19858.                                                          |
| 31    | 14 35 35'79 | +3'81                   | 132 21 4'1  | +25'9                     | Argent. Gen. Cat. 19889; Stone,<br>7993.                                          |
| 32    | 14 23 39'05 | +3'65                   | 133 24 27'8 | +26'8                     | Argent. Gen. Cat. 19604; Stone,<br>7893.                                          |
| 33    | 14 28 8     | +3'69                   | 133 34      | +26'7                     | Equatorial. Star=8½ mag.                                                          |
| 34    | 14 18 11'48 | +3'56                   | 133 50 47'0 | +27'2                     | Argent. Gen. Cat. 19477; Stone,<br>7853.                                          |
| 35    | 14 15 34'10 | +3'51                   | 134 11 26'4 | +27'4                     | Argent. Gen. Cat. 19418.                                                          |
| 36    | 14 25 12'64 | +3'64                   | 134 21 13'0 | +27'1                     | Argent. Gen. Cat. 19649; Stone,<br>7909.                                          |
| 37    | 14 14 11'89 | +3'49                   | 134 42 55'6 | +27'6                     | Argent. Gen. Cat. 19379; Stone,<br>7819.                                          |
| 38    | 14 17 15'97 | +3'50                   | 135 11 54'0 | +27'6                     | Argent. Gen. Cat. 19453.                                                          |
| 39    | 14 12 52'42 | +3'41                   | 135 35 13'8 | +27'8                     | Argent. Gen. Cat. 19354; Melb.<br>187c, 723; Stone, 7806; Cape<br>Cat. 1885, 982. |

| Star. | Mean E.A.   | Red. to<br>App.<br>R.A. | Mean N.P.D. | Re <sup>d</sup> . to<br>App.<br>N.P.D. | Authorities.                                                                     |
|-------|-------------|-------------------------|-------------|----------------------------------------|----------------------------------------------------------------------------------|
|       | h m s       | s                       | ° ' "       | "                                      |                                                                                  |
| 40    | 14 14 56    | +3.43                   | 136 12 "    | +27.9                                  | Equatorial. Star = 9 mag.                                                        |
| 41    | 14 16 28    | +3.46                   | 136 12      | +27.9                                  | Equatorial. Star = 9 mag.                                                        |
| 42    | 14 18 18.82 | +3.48                   | 136 3 57.8  | +27.7                                  | Argent. Gen. Cat. 19482; Stone, 7855.                                            |
| 43    | 14 4 29     | +3.28                   | 136 26      | +28.3                                  | Equatorial. Star = 7½ mag.                                                       |
| 44    | 14 10 36.39 | +3.36                   | 136 26 14.6 | +28.1                                  | Argent. Gen. Cat. 19318.                                                         |
| 45    | 14 4 26     | +3.26                   | 136 26      | +28.2                                  | Equatorial. Double star = 8½ and 9 mag. Preceding and south component employed.  |
| 46    | 14 0 28.97  | +3.17                   | 137 6 5.1   | +28.4                                  | Argent. Gen. Cat. 19120; Stone, 7713.                                            |
| 47    | 14 4 10.30  | +3.23                   | 137 17 9.4  | +28.4                                  | Argent. Gen. Cat. 19198.                                                         |
| 47    | 14 4 10.30  | +3.21                   | 137 17 9.4  | +28.3                                  | " " 19198.                                                                       |
| 48    | 13 49 39.49 | +2.93                   | 138 23 24.2 | +28.7                                  | Argent. Gen. Cat. 18907; Stone, 7631.                                            |
| 49    | 13 51 19.84 | +2.96                   | 138 31 12.4 | +28.7                                  | Argent. Gen. Cat. 18945; Stone, 7650.                                            |
| 50    | 13 50 21    | +2.92                   | 138 36      | +28.6                                  | Equatorial. Star = 8½ mag.                                                       |
| 51    | 13 48 55    | +2.86                   | 139 11      | +28.6                                  | Equatorial. Star = 9½ mag.                                                       |
| 52    | 13 41 16.15 | +2.73                   | 139 36 53.0 | +28.7                                  | Argent. Gen. Cat. 18721; Stone, 7545.                                            |
| 53    | 13 43 39    | +2.77                   | 139 38      | +28.7                                  | Equatorial. Star = 8½ mag.                                                       |
| 54    | 13 52 44.56 | +2.86                   | 139 52 19.4 | +28.5                                  | Argent. Gen. Cat. 18973; Stone, 7665.                                            |
| 55    | 13 46 13.67 | +2.74                   | 140 24 56.5 | +28.6                                  | Argent. Gen. Cat. 18837; Stone, 7589.                                            |
| 56    | 13 40 11.97 | +2.61                   | 140 55 13.9 | +28.5                                  | Argent. Gen. Cat. 18700; Stone, 7538.                                            |
| 57    | 13 39 36.10 | +2.53                   | 141 47 38.7 | +28.3                                  | Argent. Gen. Cat. 18686.                                                         |
| 58    | 13 39 38.30 | +2.49                   | 142 0 7.9   | +28.1                                  | " " 18689.                                                                       |
| 59    | 13 45 28.75 | +2.55                   | 142 18 13.5 | +28.1                                  | Argent. Gen. Cat. 18814; Stone, 7578.                                            |
| 60    | 13 45 30.62 | +2.55                   | 142 18 19.5 | +28.1                                  | Argent. Gen. Cat. 18817; Stone, 7579.                                            |
| 61    | 13 40 31.07 | +2.45                   | 142 46 19.8 | +28.0                                  | Argent. Gen. Cat. 18706; Stone, 7539.                                            |
| 62    | 13 33 25.47 | +2.32                   | 142 56 51.2 | +27.8                                  | Melb. Cat. 1870, 683; Argent. Gen. Cat. 18559; Stone, 7478; Cape Cat. 1885, 935. |
| 63    | 13 37 57    | +2.37                   | 143 13      | +27.8                                  | Equatorial. Star = 8½ mag.                                                       |
| 64    | 13 35 12.82 | +2.26                   | 144 2 30.8  | +27.5                                  | Argent. Gen. Cat. 18587; Stone, 7491.                                            |
| 65    | 13 32 9.59  | +1.93                   | 147 6 11.2  | +26.0                                  | Argent. Gen. Cat. 18532; Stone, 7468.                                            |
| 66    | 13 36 52.80 | +2.01                   | 147 4 30.1  | +26.2                                  | Argent. Gen. Cat. 18622; Stone, 7513.                                            |
| 67    | 13 33 41.99 | +1.93                   | 147 24 28.1 | +26.0                                  | Argent. Gen. Cat. 18564.                                                         |

Dec. 1898.

*Comet Coddington* (c 1898).

99

| Star. | Mean R.A. | Red. to<br>App.<br>R.A. | Mean N.P.D. | Red. to<br>App.<br>N.P.D. | Authorities.                                                |
|-------|-----------|-------------------------|-------------|---------------------------|-------------------------------------------------------------|
|       | h m s     | s                       | o ' "       | "                         |                                                             |
| 68    | 13 31 26  | +1'87                   | 147 53 36   | +25'8                     | Argent. Gen. Cat. 18513; Stone, 7457.                       |
| 69    | 13 38 52  | +1'99                   | 147 43 47   | +26'0                     | Argent. Gen. Cat. 18663; Stone, 7527.                       |
| 70    | 13 35 15  | +1'88                   | 148 16 13   | +25'6                     | Argent. Gen. Cat. 18586; Stone, 7492.                       |
| 71    | 13 34 22  | +1'84                   | 148 42 36   | +25'4                     | Argent. Gen. Cat. 18572.                                    |
| 72    | 13 37 8   | +1'88                   | 148 43 16   | +25'5                     | Argent. Gen. Cat. 18626; Stone, 7516.                       |
| 73    | 13 41 45  | +1'93                   | 148 59 7    | +25'5                     | Argent. Gen. Cat. 18727; Stone, 7547.                       |
| 74    | 13 42 34  | +1'91                   | 149 25      | +25'4                     | Equatorial. Star = 8½ mag.                                  |
| 75    | 13 42 14  | +1'84                   | 150 14 36   | +25'1                     | Argent. Gen. Cat. 18738; Stone, 7550.                       |
| 75    | 13 42 14  | +1'83                   | 150 14 36   | +24'8                     | Argent. Gen. Cat. 18738; Stone, 7550.                       |
| 76    | 13 41 8   | +1'81                   | 150 17 54   | +24'8                     | Argent. Gen. Cat. 18715.                                    |
| 77    | 13 35 42  | +1'65                   | 151 13 18   | +24'4                     | Argent. Gen. Cat. 18596; Stone, 7498.                       |
| 78    | 13 36 15  | +1'66                   | 151 11 38   | +24'3                     | Argent. Gen. Cat. 18611; Stone, 7504.                       |
| 79    | 13 39 12  | +1'65                   | 151 56 23   | +24'1                     | Argent. Gen. Cat. 18668; Stone, 7528.                       |
| 80    | 13 42 49  | +1'72                   | 151 46 0    | +24'2                     | Argent. Gen. Cat. 18755; Stone, 7554.                       |
| 81    | 13 45 16  | +1'67                   | 152 51 2    | +23'8                     | Argent. Gen. Cat. 18803; Stone, 7574.                       |
| 82    | 13 50 54  | +1'56                   | 155 18 2    | +22'7                     | Argent. Gen. Cat. 18931; Stone, 7643.                       |
| 83    | 13 46 57  | +1'40                   | 156 23 51   | +21'9                     | Argent. Gen. Cat. 18845; Stone, 7595.                       |
| 84    | 13 47 0   | +1'40                   | 156 23 34   | +21'9                     | Argent. Gen. Cat. 18846.                                    |
| 85    | 13 51 28  | +1'40                   | 157 20 34   | +21'7                     | Argent. Gen. Cat. 18939; Stone, 7647.                       |
| 86    | 13 51 47  | +1'41                   | 157 21 0    | +21'7                     | Argent. Gen. Cat. 18950; Stone, 7651.                       |
| 87    | 13 59 38  | +1'52                   | 157 39 28   | +21'8                     | Argent. Gen. Cat. 19094.                                    |
| 88    | 14 0 49   | +1'54                   | 157 39 14   | +21'8                     | „ „ 19121.                                                  |
| 89    | 13 54 18  | +1'30                   | 159 6       | +21'0                     | Equatorial. Star = 9 mag.                                   |
| 90    | 14 2 37   | +1'44                   | 159 14 7    | +21'1                     | Melb. Cat. 1870, 713; Argent. Gen. Cat. 19164; Stone, 7733. |
| 91    | 14 4 31   | +1'26                   | 161 38 34   | +20'1                     | Gilliss's Cat. 1850, 9875.                                  |
| 92    | 14 18 35  | +1'44                   | 162 43 28   | +19'9                     | „ „ 10059.                                                  |

*Observatory, Peninsula, Windsor,  
N.S. Wales: 1898 Oct. 29.*

*Cometary Observations at the Liverpool Observatory, 1897-8. By W. E. Plummer, M.A.*

The following observations form a continuation of the series of measures published in May 1896. The remarks made in that place concerning the instrument employed and the nature of the micrometers apply equally well to these observations. The general faintness of the Comets that have been recently discovered has operated unfavourably in many cases, and, notwithstanding the number of these objects recently discovered, the number of observations is less than in former years.

*Comet VII. 1896 (Perrine, December 8).*

| Greenwich Mean<br>Time of<br>Observation. | *R.A. |    | Apparent<br>R.A. of ☉. |    | Declination. |    | No. of<br>Compari-<br>sons. | No. of<br>Compari-<br>sons. | Apparent<br>Declination<br>of ☉. |    | Log. Factor<br>of Parallax<br>in (α). | Log. Factor<br>of Parallax<br>in (δ). | Star<br>of Com-<br>parison. |      |    |    |      |         |         |    |
|-------------------------------------------|-------|----|------------------------|----|--------------|----|-----------------------------|-----------------------------|----------------------------------|----|---------------------------------------|---------------------------------------|-----------------------------|------|----|----|------|---------|---------|----|
|                                           | h     | m  | s                      | h  | m            | s  |                             |                             | '                                | "  |                                       |                                       |                             | o    | '  | "  |      |         |         |    |
| 1896.<br>Dec. 11                          | 7     | 10 | 30.1                   | -2 | 21.99        | +0 | 53.22                       | 25                          | 1                                | 9  | 53.22                                 | +2                                    | 30.9                        | 5    | +5 | 23 | 10.2 | -8.8616 | -0.8143 | 1  |
| 22                                        | 7     | 0  | 55.0                   | +0 | 53.61        | -2 | 35.87                       | 30                          | 2                                | 23 | 35.87                                 | +5                                    | 8.2                         | 6    | +1 | 35 | 11.6 | -9.1169 | -0.8386 | 2  |
| 27                                        | 6     | 17 | 40.6                   | -2 | 18.55        | -2 | 42.27                       | 25                          | 2                                | 52 | 42.27                                 | -5                                    | 52.5                        | 5    | +0 | 28 | 3.8  | -9.3045 | -0.8450 | 3  |
| 27                                        | 6     | 17 | 40.6                   | -2 | 3.88         | -2 | 42.34                       | 25                          | 2                                | 52 | 42.34                                 | -0                                    | 56.7                        | 5    | +0 | 28 | 2.6  | -9.3045 | -0.8450 | 4  |
| 28                                        | 8     | 0  | 23.2                   | -1 | 24.28        | -1 | 34.21                       | Ret.                        | 2                                | 58 | 34.21                                 | -10                                   | 49.8                        | Ret. | +0 | 16 | 29.2 | -8.7774 | -0.8457 | 5  |
| 30                                        | 8     | 40 | 7.3                    | +1 | 9.87         | +1 | 16.30                       | "                           | 3                                | 9  | 16.30                                 | +10                                   | 15.3                        | "    | -0 | 2  | 19.7 | -7.7951 | -0.8474 | 6  |
| 1897.<br>Jan. 5                           | 7     | 42 | 37.9                   | -1 | 41.53        | -1 | 0.62                        | 25                          | 3                                | 38 | 0.62                                  | -0                                    | 47.4                        | 5    | -0 | 37 | 56.5 | -8.9920 | -0.8506 | 7  |
| 8                                         | 8     | 2  | 0.4                    | -3 | 6.97         | -3 | 4.70                        | 30                          | 3                                | 51 | 4.70                                  | -4                                    | 17.4                        | 6    | -0 | 46 | 8.3  | -8.8522 | -0.8514 | 8  |
| 20                                        | 7     | 3  | 51.2                   | -0 | 58.25        | -0 | 8.92                        | Ret.                        | 4                                | 35 | 8.92                                  | +3                                    | 11.8                        | Ret. | -0 | 32 | 20.7 | -9.1785 | -0.8499 | 9  |
| 26                                        | 9     | 32 | 45.0                   | -1 | 30.65        | -1 | 56.86                       | "                           | 4                                | 53 | 56.86                                 | +5                                    | 3.4                         | "    | -0 | 6  | 38.5 | +8.8988 | -0.8478 | 10 |
| 26                                        | 9     | 32 | 45.0                   | +0 | 35.01        | +0 | 56.73                       | "                           | 4                                | 53 | 56.73                                 | -5                                    | 9.1                         | "    | -0 | 6  | 41.2 | +8.8988 | -0.8478 | 11 |
